# Supplementary material for: Unbound Low-Energy Nucleons As Semiclassical Quantum Networks
Source: Preprints.org preprint supplement (doi:10.20944/preprints202405.0932.v1), 2024-05-14
Supplement: Supplementary file 1 [file supplementary]

## Sheet: Sheet1
Title: Unbound low-energy nucleons as semiclassical quantum networks																							Authors affiliated with University of Wisconsin at La Crosse, La Crosse, WI 54601, USA:
Authors and affiliations in column X																							Steven C. Verrall, Andrew Kaminsky, Isaac Ozolins, Emily Friederick, Andrew Otto, Ivan Ngian, Reagen McCormick, Pearl Scallon, Seth Schaffer, Stephanie San Juan
																							email: sverrall@uwlax.edu; steven.verrall@gmail.com
																							Andrew Kaminsky also with Multistack, 1065 Maple Ave, Sparta, WI 54656, USA
																							Andrew Kaminsky also with Benchmark, 4065 Theurer Blvd, Winona, MN 55987, USA
																							Isaac Ozolins also with ThermTech, Inc., 301 Travis Lane, Waukesha, WI 53189, USA
																							Andrew Otto also with St. Croix Health, 235 State Street, St. Croix Falls, WI 54024, USA
																							Kori N. Verrall affiliated with La Crosse Aquinas High School, 315 11th St S, La Crosse, WI 54601, USA
																							Peter Lynch affiliated with School of Mathematics and Statistics, University College Dublin, Belfeld, Dublin 4, Ireland
R_n	m_n	h	c	λ_n	r_nz	r_na	V_no	φ_nl	V_ni	A_noE	A_no	A_niE	A_ni	Q_nex	μ_n	r_n	δ_n	[]	m_n (MeV/c^2)	r_no A_no/V_no	r_ni A_ni/V_ni	φ_na	Kelly S. Verrall unaffiliated independent researcher in La Crosse, WI 545601, USA
6.59795e-16	1.67493e-27	6.62607e-34	299792458	1.31959e-15	1.0501e-16	3.29898e-16	3.06208e-45	1.0472	2.2725e-46	1.23087e-29	1.04663e-29	1.36763e-30	1.87325e-30	0.0668112	-1.91	9.0083e-16			939.565	3.07907	3.12055	2.0944
															-1.91263
															-1.91304
																		-1.03798
															-1.92962
															-1.91301
																							a	b	c	δ_n	δ_n/Q_nex
6.59795e-16	1.67493e-27	6.62607e-34	299792458	1.31959e-15	1.0501e-16	3.29898e-16	3.06208e-45	1.0472	2.2725e-46	1.23087e-29	1.04663e-29	1.36763e-30	1.87325e-30	0.0668112	-1.91304	9.0083e-16	0.000370115			3.07907	3.12055	2.0944	9.24257e-45	3.97655e-44	-1.47191e-47	0.000370115	180.515
R_p	m_p	h	c	λ_p	r_pz	r_pa	V_po	φ_pl	V_pi	A_poE	A_po	A_piE	A_pi	Q_pex	μ_p	r_s	δ_p	α	e	r_po A_po/V_po	r_pi A_pi/V_pi	q_u	q_d	average β_n	average β_p
								1.43642						0.00749621				0.00729735
																						0.0569554	0.0284777
																						0.0569497	0.0284748
																								0.537606
																									0.599996
														0.00748978
																		0.0072974
																						1.06812e-19
																							5.34061e-20
																								k_po	k_pi	k_no	k_ni
																								0.992504
																									0.207488
																										0.744378
																											0.330835
																												m_charm						m_p (MeV/c^2)
																												1281.7						938.272
																												1278.82	ϑ_ent	charm%	p_c%	charm%	p_c%
																												1270	0.102007
																														0.259909		0.259909
																															0.703602		0.703602
															0.623077
R_p	m_p	h	c	λ_p	r_pz	r_pa	V_po	φ_pl	V_pi	A_poE	A_po	A_piE	A_pi	Q_pex	μ_p	r_s	δ_p	α	e	r_s A_po/V_po	r_pi A_pi/V_pi	r_A
																	0.00027353
7.62916e-16	1.67262e-27	6.62607e-34	299792458	1.32141e-15	1.05154e-16	1.02211e-16	2.49726e-45	1.43642	1.32288e-45	9.40525e-30	8.91903e-30	5.48561e-30	5.84065e-30	0.00749621	2.79285	8.41638e-16	0.00027353	0.00729735	1.60218e-19	3.00593	3.00667
																						7.62916e-16
																						7.56038e-16
																8.41638e-16
																				3.00593
																					3.00667	r_pi
																						6.80994e-16	r_no A_no/V_no	r_ni A_ni/V_ni
																							3.07907	3.12055	r_no	r_ni
																									9.0083e-16	3.78563e-16
																r_eff
																8.40936e-16
R_p	m_p	h	c	λ_p	r_pz	r_pa	V_po	φ_pl	V_pi	A_poE	A_po	A_piE	A_pi	Q_pex	μ_p	r_s	δ_p	α	e	r_s A_po/V_po	r_pi A_pi/V_pi		a	b	c	δ_p
7.62916e-16	1.67262e-27	6.62607e-34	299792458	1.32141e-15	1.05154e-16	1.02211e-16	2.49726e-45	1.43642	1.32288e-45	9.40525e-30	8.91903e-30	5.48561e-30	5.84065e-30	0.00749621	2.79285	8.41638e-16	0.000273535	0.00729735	1.60218e-19	3.00593	3.00667		-8.22429e-45	2.17369e-44	-5.94518e-48	0.000273535
																	δ_n
																	0.000370128
R_n	m_n	h	c	λ_n	r_nz	r_na	V_no	φ_nl	V_ni	A_noE	A_no	A_niE	A_ni	Q_nex	μ_n	r_n	0.000370122			r_no A_no/V_no	r_ni A_ni/V_ni	φ_na
6.59795e-16	1.67493e-27	6.62607e-34	299792458	1.31959e-15	1.0501e-16	3.29898e-16	3.06208e-45	1.0472	2.2725e-46	1.23087e-29	1.04663e-29	1.36763e-30	1.87325e-30	0.0668112	-1.91304	9.0083e-16	0.000370128			3.07907	3.12055	2.0944
6.59795e-16	1.67493e-27	6.62607e-34	299792458	1.31959e-15	1.0501e-16	3.29898e-16	3.06208e-45	1.0472	2.2725e-46	1.23087e-29	1.04663e-29	1.36763e-30	1.87325e-30	0.0668112	-1.91304	9.0083e-16	0.000370122			3.07907	3.12055	2.0944	m_u+m_d
																							6.882
